# Supplementary material
Source: Research Square preprint supplement (doi:10.21203/rs.3.rs-9471666/v1)
Supplement: Supplementary file 1 [file 21adb453d05f08d49664ce22.docx]

**Phase II trial of Pembrolizumab and Lenvatinib in Advanced Neuroendocrine Prostate Cancer (PLANE-PC).**

**Statistical Analysis Plan:**

**Biostatistician: Jeremy Taylor PhD**

***Study Design***

The primary objective of the study was to evaluate 6-month radiographic progression free survival (rPFS) with lenvatinib and pembrolizumab combination therapy in metastatic neuroendocrine prostate cancer (NEPC). In cases with measurable disease, radiological progression time was defined as the date of Cycle 1 Day 1 to date of progression per RECIST 1.1 criteria for measurable disease and for patients with bone only metastases per PCWG3 criteria for patients with non-measurable disease [16, 17]. For the binary primary endpoint, a 2-stage Simon near optimal design was used [18], with these input parameters: p0 = 0.10; p1 = 0.25; alpha = 0.125; and power = 0.90. This resulted in the following design features: N1 = 27; R1 = 2; N = 40; R = 6; Probability of Early Termination = 0.485; and Expected Sample Size = 33.70. Hence, if there were at least 3 successes (patients who have had ≥ 6.00 months of rPFS) in the 27 patients in Stage 1 then the study would proceed to Stage 2, otherwise it would terminate early. If there were at least 7 patients progression free for 6 months or longer, in the 40 evaluable patients, then the treatment would be considered promising.

***Data Analysis Methods***

A consort diagram shows information on duration of treatment (<=21 days, 22-180 days, >180 days), best response (not assessed, PD, SD, PR), and overall survival (< 6months, > 6 months).

Patients who did not have radiological assessment of progression were considered non evaluable for response. The assessment of best response and duration of response was restricted to evaluable patients. For the outcomes of PFS, OS and toxicities, the data from all enrolled patients were analyzed. The time of the event for PFS was defined in the following way: (i) For patients who had radiologically assessed progressive disease (PD) or clinically determined progression, that time to progression determined the event time. (ii) For patients who had radiological assessment but did not show PD and did not have clinical progression, if they died within 9 weeks of the last scan they were considered to have progression at the time of death, whereas if they survived more than 9 weeks after the last scan they were censored for PFS at the time of the last scan. (iii) For patients who did not have any radiological assessment of disease and did not have clinical progression, if they died within 9 weeks of the start of treatment the date of death was used as the event time, if they survived more than 9 weeks then they were censored for PFS at 9 weeks.

Kaplan -Meier analysis depicting PFS and OS was conducted. Stratified Kaplan Meier plots were used to assess the association between patient characteristics and time-to-event endpoints.

Swimmer plots were used to display time to progression (as defined by either radiological or clinical assessment), time on treatment and overall survival. Patients were separated by best response based on scans. PSA response, amongst patients who had a detectable PSA at baseline (PSA >=1.0), were displayed using waterfall plots and line trajectory plots. For patients with measurable disease, trajectories of lesion size (largest diameter based on CT scans) over time for the target lesions were displayed using line plots. Long term survivors were defined as those alive 12 months after they received the first dose.
